# Supplementary material for: MCMV based vaccine vectors expressing full-length viral proteins provide long-term humoral immune protection upon a single-shot vaccination
Source: Research Square preprint supplement (doi:10.21203/rs.3.rs-566785/v1), 2021-06-03
Supplement: Supplementary file 1 [file dd570aac1128b35e35a92f98.xlsx]

## Sheet: Sheet1
	Neutralization (pVNT50 and VNT50)
	Pseudotyped VSV-S				SARS-CoV-2 (FI strain)
		WH01	B1.1.7	B1.351	MCMVS	MCMVS
		+D614G			(Total Ig isotypes)	(IgG isotypes)
	day 7				1:84.09	1:10.70
					(33.69-231.6)	(2.54-20.83)
	day 14				1:55.93	1:31.90
					(23.36-133.4)	(13.37-63.53)
	day 28				1:227.5	1:202.5
					(168-429.5)	(104.7-332.2)
	day 56	1:910.5	1:945.2	1:450.6	1:476.4	1:407
					(399.2-1251)	(275.7-883.3)
